# Supplementary material for: Using portable low-resolution spectrometers to evaluate TCCON biases in North America
Source: Copernicus journal article supplement (doi:10.5194/egusphere-2022-1331), 2022-12-02
Supplement: Supplementary file [file egusphere-2022-1331-AC3-supplement.pdf]

## Authors' Response to Reviews of

# Using portable low-resolution spectrometers to evaluate TC-CON biases in North America

Nasrin Mostafavi Pak, Jacob Hedelius, Sébastien Roche, Liz Cunningham, Bianca Baier, Colm Sweeney, Coleen Roehl, Joshua Laughner, Geoffrey Toon, Paul Wennberg, Harrison Parker, Colin Arrowsmith, Joseph Mendonca, Pierre Fogal, Tyler Wizenberg, Beatriz Herrera, Kimberly Strong, Kaley A. Walker, Paul Wennberg, Felix Vogel, Debra Wunch  
*Atmospheric Measurement Techniques*,

---

RC: *Reviewers' Comment*, AR: Authors' Response, □ Manuscript Text

We would like to thank the reviewer for their thoughtful comments that have helped to improve our manuscript substantially. The detailed response and corrections are given below.

## Reviewer #2

### General Comments

#### 2.3 ILS measurements:

**RC:** *Although ILS measurements using open path H<sub>2</sub>O spectra were made where possible, they are not used in any way in the retrievals. They seem to be used only qualitatively as an indication of any possible change in alignment. The version of linefit used (14.0, with full 20-parameter model) is different from that recommended by Alberti et al. (2021) (14.8, simple 2-parameter fit). The ME at maximum OPD derived here is not as unique as a measure of ILS as the simple 2 parameter version because it depends on the shape of the ME or phase vs OPD curves and on the SNR, regularisation and a priori assumptions. Thus the only real message from this section is that there was no major change of alignment from the 4 instruments (Fig 2, lower), and this section could possibly be shortened to reflect that.*

**AR:** Agreed. In this study ILS is only used qualitatively to ensure the optical alignment of the instruments haven't been changed significantly during the road trip after being transported from one site to the other. We have added additional explanation in this section for clarification:

Instrumental Line Shape (ILS) is a measure of the optical alignment of the instrument and imperfections in this alignment can cause biases in the retrievals. The ILS of an FTS can be described by two parameters: Phase Error (PE) and Modulation Efficiency (ME). For high resolution FTS instruments (TCCON) ILS is typically reported as function of optical path difference (OPD) and for the low resolution EM27/SUNs these are typically reported at the maximum optical path difference. ILS values are not implemented into the GGG2014 and GGG2020 retrieval algorithms and are only used to evaluate the instruments' alignment qualitatively. TCCON guidelines require that the modulation efficiency deviates less than 5% from 1.0, over 0 to 45 cm OPD. A modulation loss of 1% in the EM27/SUN causes a bias of 0.1% in XCO<sub>2</sub> and 0.15% in XCH<sub>4</sub> (Hedelius et al., 2016), therefore we aim to ensure that the EM27/SUN ME variations remain less than 1%.

### 3.1.1. Airmass dependent correction factors (ADCFs):

**RC:** *Although the ADCF method is referenced, I think the formula/algorithm for the correction should be summarised here; there is otherwise no information in the paper about how the factors listed in Table 3 are applied and the reader has no idea how to interpret them. TCCON ADCFs also include a reference SZA around which the correction is expanded, and an exponent in the formula. It should be stated if/that these are fixed for EM27 analyses, and to which values. In line 267, perhaps reword slightly to make clearer that the derived ADCFs are obtained by fitting the long term 2018-2021 records from the 4 instruments to mean values for this dataset, and that these mean values are then applied to all further measurements.*

**AR:** We have added additional explanations and formula to make this section more clear:

In this model, an asymmetric function ( $A(t_i)$ ) representing true variations in Xgas over the course of the day and a symmetric function ( $S(\theta_i)$ ) representing the airmass dependant artefact are used to fit to the daily measured Xgas values during the course of the day (Wunch et al. , 2011).

$$y_i = \hat{y}[1 + \alpha A(t_i) + \beta S(\theta_i)] \quad (1)$$

where  $y_i$  is the Xgas from each spectrum and  $\hat{y}$  is the mean value of XCO<sub>2</sub> on that day.  $A(t_i)$  and  $S(\theta_i)$  are defined as (Wunch et al. , 2011):

$$A(t_i) = \sin(2\pi(t_i - t_{noon})) \quad (2)$$

where  $t_i$  and  $t_{noon}$  are in unit of days.

$$S(\theta_i) = \left(\frac{\theta_i + \theta_0}{90 + \theta_0}\right)^p - \left(\frac{45 + \theta_0}{90 + \theta_0}\right)^p \quad (3)$$

where  $\theta_i$  is in degrees and  $\theta_0$  and  $p$  are empirically found to be 13° and 3, respectively.  $\alpha$  and  $\beta$  are found by minimizing the difference between the measured  $y_i$  and the fitted functions. Airmass dependent correction is then applied to Xgas by:

$$y_c = \frac{y_i}{[1 + \beta S(\theta_i)]} \quad (4)$$

where  $\beta$  is the airmass dependant correction factor (ADCF) and  $y_c$  is the airmass corrected Xgas value.

### 3.1.2 Instrument-instrument biases and “calibration”:

**RC:** *Are the bias corrections to the raw measurements applied multiplicatively or additively? As with the ADCF, it would be helpful to spell out near line 300 the algebraic algorithm used for this (and every) correction. In the COCCON network a similar process is followed, and though Frey 2019 is referenced, it is not discussed or compared. I think it would be helpful to add some text to compare the approach here with that of COCCON, for example to (hopefully) demonstrate that both groups see similar biases. Ultimately the*

*research community that uses these data needs to know that biases between instruments not only within the N American and European-centred networks are minimised, but also that they also minimised between the networks. The two networks use different retrieval codes, so it is quite important to be confident they do not introduce any relative bias.*

AR: In this study the bias correction is applied additively. We have briefly summarized the Frey et al. results for comparison:

The range of the biases are up to 0.2 ppm in XCO<sub>2</sub>, 4 ppb for XCH<sub>4</sub> and 0.8 ppb for XCO. In a study by Frey et al. (2019b), biases between 30 EM27/SUNs were evaluated and a scale factors of 0.999-1.0004 for XCO<sub>2</sub> and 0.9975-1.0026 for XCH<sub>4</sub> were found. This would be equivalent to an average bias of 0.6 ppm for XCO<sub>2</sub> for an average DMF of 400 ppm and 9 ppb for XCH<sub>4</sub> for an average DMF of 1840 ppb. We observe smaller biases between our instruments, which might be expected as we only compare 4 EM27/SUNs.

#### 4. Evaluation of TCCON biases against the EM27/SUNs (and Discussion):

RC: *This section could be improved and more readable by reorganising to separate out the “comparison with TCCON” from the “discussion” of the interpretation of the time series such as at Eureka. For example the paragraph from L 348 discusses the atmospheric interpretation of the Eureka time series, then the discussion returns to the TCCON-EM27 biases in Fig 10 and Table 6. Perhaps this paragraph could be merged into the current section 4.1? In the TCCON-EM27 bias section, since Xluft has been added to Fig 8, I would recommend also adding the mean Xluft values to Table 5 so the reader can do their own sanity check to see just how different from 1.000 they are.*

AR: As also suggested by reviewer 1, we have moved the discussion about Eureka to section 4.1. We also have added a table to present the average xluft values:

Table 1: Average Xluft values measured by TCCON (125 HR) and the reference EM27/SUN (tb)

| TCCON Site           | Average TCCON Xluft | Average EM27/SUN Xluft (tb) |
|----------------------|---------------------|-----------------------------|
| Caltech (ci)         | 0.9993              | 1.0020                      |
| AFRC (df)            | 0.9979              | 1.0014                      |
| Lamont (oc)          | 0.9990              | 1.0022                      |
| Park Falls (pa)      | 1.0028              | 1.0013                      |
| East Trout Lake (et) | 1.0002              | 1.0040                      |
| Eureka (eu)          | 1.0005              | 1.0066                      |

#### 5. Conclusions and general:

RC: *I would find it helpful to make more explicit comparisons with similar studies on the COCCON network, for example by Frey et al 2019, to the extent allowed by the COCCON publications. At present COCCON is acknowledged but not further compared or discussed. I am sure the modelling community would like to be able to combine results from both this work (using GGG and EGI for analysis) and COCCON (using*

*Proffast and independent post-processing) without fear of significant bias. Explicitly addressing this point of comparison would be particularly useful.*

AR: We have briefly summarized the Frey et al. results for comparisons.

Frey et al. (2019b) performed comparisons between an EM27/SUN at Karlsruhe Institute of Technology (KIT) and the KIT TCCON instrument and found a scaling factor of 1.0098 for XCO<sub>2</sub> for high resolution TCCON and 1.0014 for low resolution TCCON retrieval equivalent to 4 ppm and 0.6 ppm respectively. For XCH<sub>4</sub> a scaling factor of 1.0072 was found for high resolution TCCON and 0.9997 for low resolution TCCON equivalent to 13 ppb and 0.5 ppb respectively. One should note that the high resolution TCCON spectra were processed using GGG2014, whereas the low resolution TCCON and the EM27/SUN retrievals were performed using a different retrieval algorithm (PROFFIT version 9.6), which could explain the larger bias found between the EM27/SUN and TCCON in the Frey et al. work, compared to this study.

### Specific comments

RC: *L45: “First and foremost...” Actually, TCCON stations “first and foremost” use consistent spectrometer hardware and data collection protocols to collect spectra, before using consistent data analysis methods.*

AR: We have made changes in text as recommended:

There are certain practices in place to ensure site-to-site consistency between TCCON observations. First and foremost, each TCCON station is equipped with nearly identical spectrometer hardware, and each dataset is analyzed using a consistent version of the GGG software, including identical spectroscopy.

RC: *L54: cm-1 not italicised*

AR: We have made changes in text as recommended throughout the text:

The EM27/SUNs (by Bruker Optics GmbH) are portable solar-viewing FTS instruments with a lower spectral resolution (0.5 cm<sup>-1</sup>) than TCCON (0.02 cm<sup>-1</sup>) that can be used to measure total column abundances of CO<sub>2</sub>, CH<sub>4</sub>, H<sub>2</sub>O, and CO in...

RC: *L82: The original design includes (not consists of) one InGaAs detector...*

AR: We have made changes in text as recommended:

The original design includes one InGaAs detector, and records in the spectral range of ...

RC: *L104: use “there is” rather than the abbreviation “there’s” in formal text such as here.*

AR: We have made changes in text as recommended:

TCCON instruments run automatically during cloud-free times of the day when there is sufficient sunlight.

**RC:** *L106: Please state here, maybe better in section 2.2 or later site-by-site that the EM27/SUNs were at the same height asl as the TCCON trackers, or if not, how the altitude-dependent pressure correction was applied.*

**AR:** In section 2.2, we have clarified how we used the standard pressure sensor to account for differences in pressure due to differences in height:

For the EM27/SUN retrievals, we use the pressure measurements recorded by the local TCCON weather stations which have previously been calibrated against a pressure standard, with the exception of Park Falls where we used the Vaisala WXT536 pressure data for both TCCON and EM27/SUNs, since the pressure measurements made by the TCCON pressure sensor were not stable during the campaign. In addition, at AFRC and Lamont we applied additional corrections to the EM27/SUN pressures as they were deployed at a slightly different altitude than the 125HR tracking mirror at the TCCON site. In these cases, we used a Digiquartz sensor pressure standard that was measuring at the same altitude as the EM27/SUNs to calculate the difference in surface pressure and added an offset of +0.1 hPa at AFRC and +0.3 hPa at Lamont to the original pressure value.

**RC:** *L157: see L104 - it is*

**AR:** We have made changes in text as recommended:

Therefore, it is necessary to ensure that the pressure measurements are accurate by calibrating the local TCCON pressure sensors ...

**RC:** *L197: replace “high accuracy” with “traceable accuracy”*

**AR:** We have made changes in text as recommended:

In order to achieve traceable accuracy, total column measurements ....

**RC:** *L198: add “calibrated” and “simultaneously” : ...against calibrated airborne in situ profiles that are simultaneously collected at the TCCON sites.*

**AR:** We have made changes in text as recommended:

... total column measurements from TCCON are tied to the WMO trace gas scale by comparing against calibrated airborne in situ measurement profiles that are simultaneously collected at the TCCON sites ...

**RC:** *L201: update ref to Tans 2009 – there was a recent and complete paper by Tans describing the theory behind Aircore.*

**AR:** We have made changes in text as recommended:

An alternative method for obtaining vertical profiles that extend higher is to use the AirCore sampling system (Tans, 2009; Karion et al., 2010; Tans, 2022).

**RC:** *L203: I think the aircore description is a little too brief - it is worth spelling out here that the aircore tube fills from one end so the earliest sample is compressed into the far end of the tube, and that diffusion is slow enough that the vertical profile is preserved along the tube length. “What about diffusion?” is the most common question I get when explaining Aircore to people.*

**AR:** We have added some more information about the AirCore to clarify the reviewer’s point:

In this method, a coiled 100-meter long hollow tube with a small inner diameter of about 0.2–0.3 cm is launched using a balloon. The AirCore is filled with a mixture of known trace gas mole fractions of interest prior to launch, and this gas evacuates during ascent. Upon descent, the nearly-empty AirCore fills with ambient air where the earliest sample is compressed into the far end of the tube. Because molecular diffusion and Taylor dispersion acts slowly within this tubing coil (Tans, 2022), there is little mixing of the continuous air sample collected within the tube and the vertical profile of the atmosphere is preserved within the tube. The tube is then sealed upon landing, retrieved and quickly analyzed using a Picarro Cavity Ring-Down Spectrometer. AirCore altitude ceilings for balloon flights are typically set to 30 km asl, with trace gas profiles derived from approximately 27 km to the surface (Karion et al., 2010).

**RC:** *L216: launches is presented ... (not are)*

**AR:** We have made changes in text as recommended:

A summary of dates, times and locations of the AirCore launches is presented in ...

**RC:** *L220 and L 225: why do you use the a priori GGG profile above the aircore ceiling rather than the scaled a priori profile after the fit? How significant is the difference? Similarly in Figure 3, why show the a priori profile and not the scaled profile after the fit?*

**AR:** We assume that atmospheric variability in XCO<sub>2</sub> and XCH<sub>4</sub> is largest near surface and smallest in the upper stratosphere and mesosphere, and therefore the scaling retrieval is more responsive to changes nearer to the surface than above the AirCore ceiling. We further assume that the prior aloft is reasonably close to truth, so we use the original prior to extend the AirCore profile up to 70 km.

The aim of Figure 3 is to show an example of the shape of the standard GGG prior and compare it with the true profile measured by the AirCore. We assume that the scaling factor retrieved when using the standard a priori includes contributions from spectroscopy errors and from real difference between the a priori profile and the true atmospheric profile. If we replace the standard a priori profile with the AirCore profile, we assume that the retrieved scaling factor represents only the scaling caused by spectroscopy errors. Therefore, to compute the AICF, we rerun gfit using the AirCore profile as the a priori to compute the AICF values. In Figure 3, we present examples of the profiles that are used as a priori profiles in GGG.

**RC:** *L231: perhaps add “... spectroscopic linelist...” Linelist may be jargon to some readers.*

**AR:** We have made changes in text as recommended:

..., and changes to the spectroscopy include improvements in the spectroscopic linelist, ...

**RC:** *L241: spell out GEOS-FPIT on first usage*

**AR:** We have made changes in text as recommended:

For GGG2020, 3-hourly vertical profiles are obtained from Goddard Earth Observing System- Forward Processing for Instrument Teams (GEOS-FPIT) atmospheric data assimilation system ...

**RC:** *L262: suggest reword to "... caused by spectroscopic and instrumental inaccuracies." Or "errors".*

**AR:** We have made changes in text as recommended:

Retrieved Xgas values have a small solar zenith angle (or airmass) dependence caused by spectroscopic and instrumental inaccuracies.

**RC:** *L278: replace "deteriorates" with "increases" or "actually increases"*

**AR:** We have made changes in text as recommended:

..., and applying the TCCON correction factors increases the airmass dependence.

**RC:** *L324: The aircore does not "float", this term comes from ballon-borne occultation measurements. Perhaps replace "float" with "maximum"*

**AR:** Changed to maximum

**RC:** *L332: can you provide a reference to justify why you can state that the altitude errors in the aircore data are negligible?*

**AR:** We integrated the AirCore after applying the altitude error and the numbers are based on our calculations. We have modified the text to make this point more clear:

The errors associated with altitude error were calculated by shifting the AirCore profile upward and downward by using the altitude error associated with each gas at each level and ceiling altitude error was calculated by integrating the profile above the AirCore ceiling assuming an error of 1 km. The errors due to altitude error and ceiling altitude error are negligible with orders of magnitude smaller than  $10^{-4}$  % for CO<sub>2</sub>,  $10^{-3}$  % for CH<sub>4</sub> and 0.01 % for CO.

**RC:** *L342: In the definition of Xluft, please indicate that Vdryair is calculated from measured surface pressure at the time of the measurement.*

**AR:** We have made changes in text as recommended:

Xluft is defined as  $Xluft = 0.2095 \times V_{dry\ air} / V_{O_2}$  where  $V$  indicates a column density (in molecules per cm<sup>2</sup>).  $V_{dry\ air}$  is calculated from measured surface pressure at the time of measurement.

**RC:** *Caption Figure 8 and 9. To be clear, I suggest you add "collocated" as in "Timeseries of EM27/SUN (tb) retrieved XCO2, XCH4, XCO and Xluft in color and co-located TCCON in...".*

**AR:** We have made changes in text as recommended:

Figure 8. Timeseries of EM27/SUN (tb) retrieved XCO<sub>2</sub>, XCH<sub>4</sub>, XCO and Xluft in colour and co-located TCCON in transparent grey during the summer 2018 campaign (GGG2020). Different sites are highlighted by a different colour.

Figure 9. Timeseries of EM27/SUN (tb) and co-located TCCON retrieved XCO<sub>2</sub>, XCH<sub>4</sub>, XCO, Xluft and XHF (TCCON only) during the spring and summer 2020 Eureka campaign (GGG2020).

**RC:** *L357: the meaning of this statement is not clear to me – reduced by a factor of 8 (2) relative to what? Single spectrum measurements, I assume – please state so. This is not so important, it is the averaging time that matters most.*

**AR:** We have added more explanation to clarify this point:

Assuming measurements are dominated by Gaussian noise, variability in the EM27/SUN averages will be reduced by a factor of 8, and variability in the TCCON averages will be reduced by a factor of 2 relative to single spectrum measurements.

**RC:** *L438: When using GGG2020, state explicitly if the site to site biases agree everywhere for both high and low resolution TCCON measurements. (From Table 6, the maximum biases are 0.53 and 0.8 ppm respectively – these are not strictly less than the variability quoted of 0.5 ppm)*

**AR:** We have made changes in text as recommended:

When using GGG2020, the site-to-site biases in the high resolution TCCON agree everywhere within the expected variability.
